# Supplementary material for: Rottlerin-Liposome Inhibits the Endocytosis of Feline Coronavirus Infection
Source: MDPI journal article supplement (doi:10.3390/vetsci10060380), 2023-05-30

Western blot original  
images

# Fig1D.

Anti FIPV-N antibody

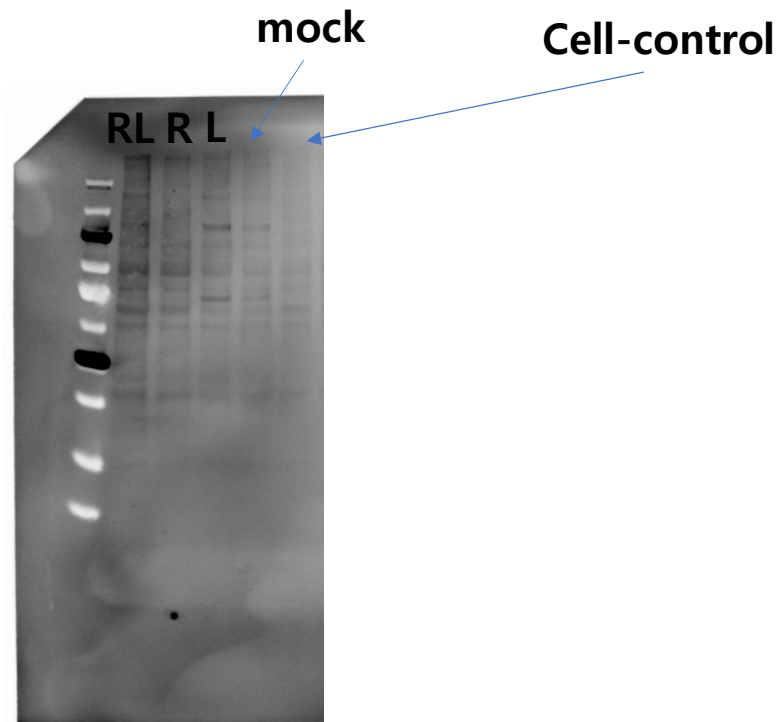

Anti  $\beta$ -actin antibody

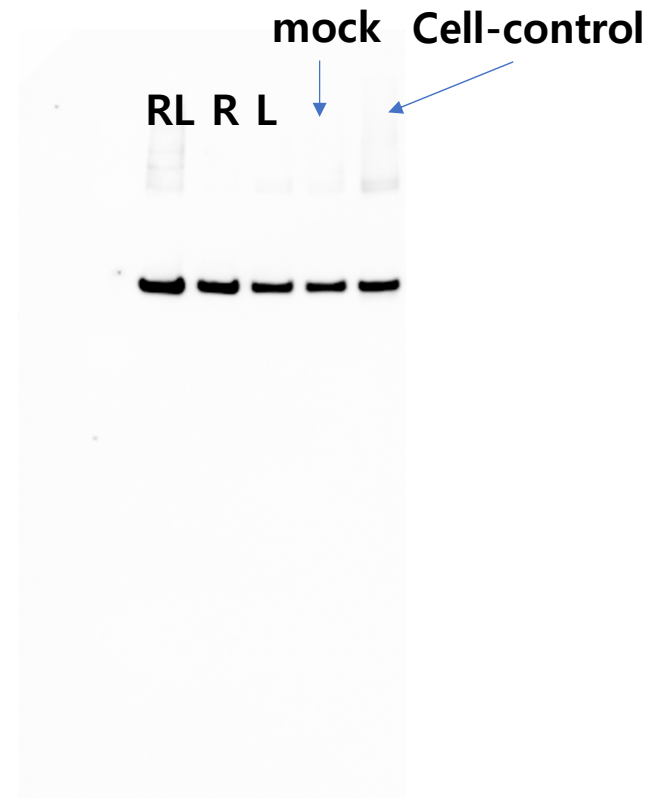

Fig2.

| 1                         | 2                         | 3                       | 4                         | 5                         | 6                       | 7                         | 8                         | 9                       | 10                        | 11                        | 12                      | marker                                                            |
|---------------------------|---------------------------|-------------------------|---------------------------|---------------------------|-------------------------|---------------------------|---------------------------|-------------------------|---------------------------|---------------------------|-------------------------|-------------------------------------------------------------------|
| 15mpi<br>(FIPV - / RL - ) | 15mpi<br>(FIPV + / RL - ) | 15mpi<br>(FIPV +/RL + ) | 30mpi<br>(FIPV - / RL - ) | 30mpi<br>(FIPV + / RL - ) | 30mpi<br>(FIPV +/RL + ) | 45mpi<br>(FIPV - / RL - ) | 45mpi<br>(FIPV + / RL - ) | 45mpi<br>(FIPV +/RL + ) | 60mpi<br>(FIPV - / RL - ) | 60mpi<br>(FIPV + / RL - ) | 60mpi<br>(FIPV +/RL + ) | Invitrogen™<br>iBright™<br>Prestained<br>Protein Ladder<br>LC5615 |

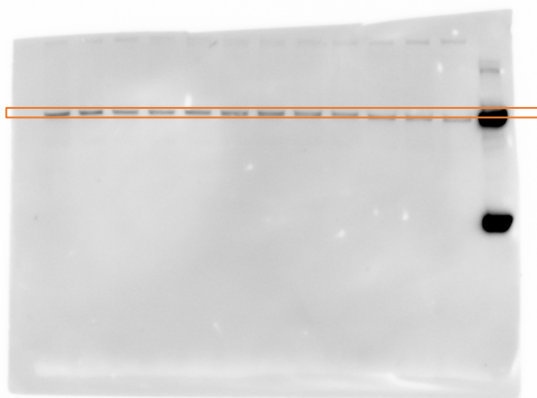

**Anti PKC $\delta$ -S645 antibody  
(phosphorylated PKC $\delta$ )**

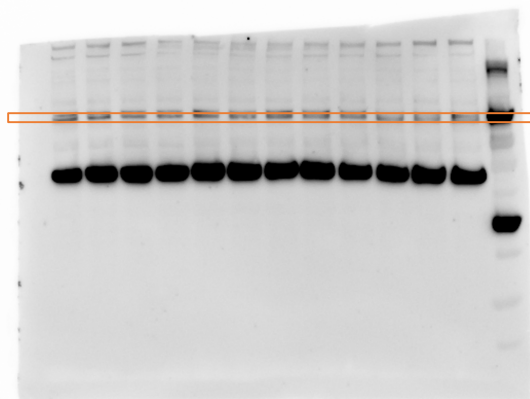

**Anti PKC $\delta$  antibody  
(total PKC $\delta$ )**

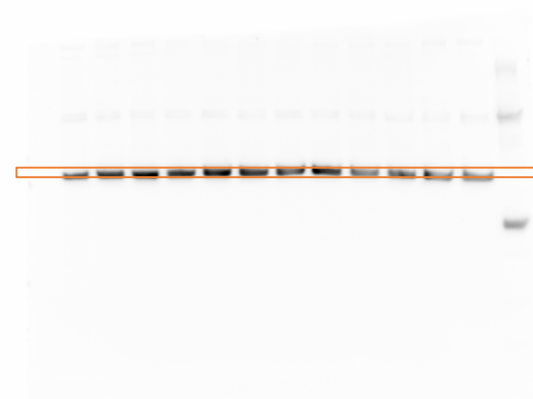

**Anti  $\beta$ -actin antibody**

Fig2.

Anti PKC $\delta$ -S645 antibody  
(phosphorylated PKC $\delta$ )  
(FIPV - / RL - )

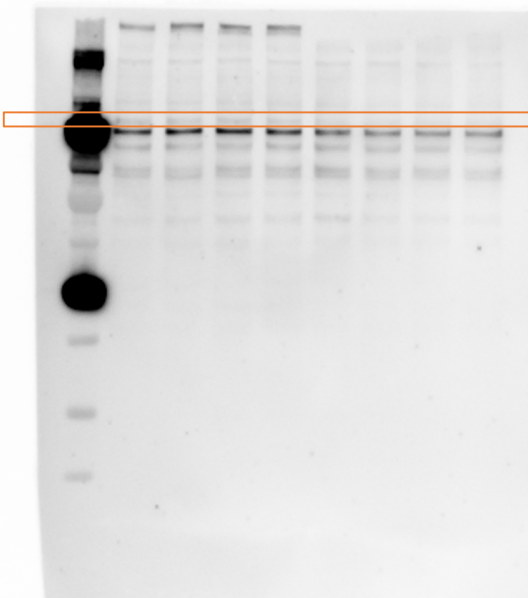

Anti PKC $\delta$ -S645 antibody  
(phosphorylated PKC $\delta$ )  
(FIPV + / RL - )

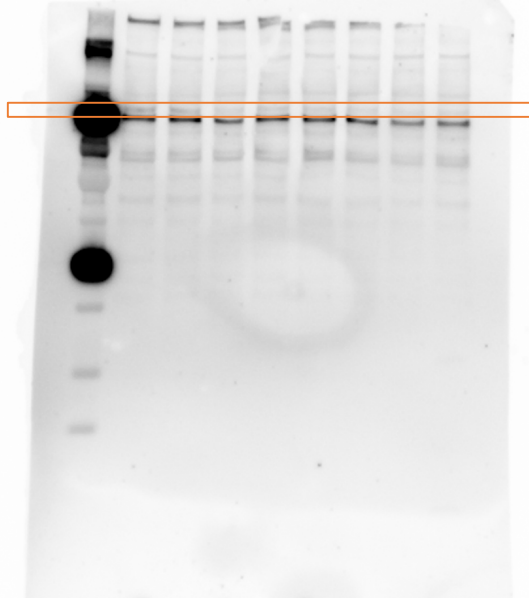

Anti PKC $\delta$ -S645 antibody  
(phosphorylated PKC $\delta$ )  
(FIPV + / RL + )

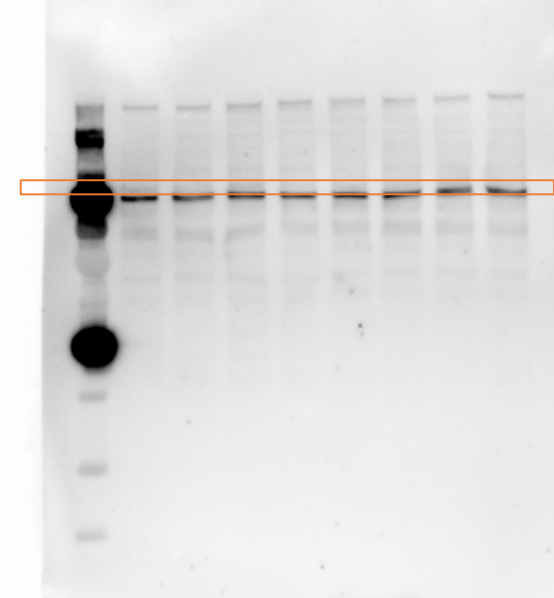

| marker                                                         | 1                       | 2                       | 3                       | 4                       | 5                       | 6                       | 7                       | 8                       |
|----------------------------------------------------------------|-------------------------|-------------------------|-------------------------|-------------------------|-------------------------|-------------------------|-------------------------|-------------------------|
| Invitrogen™<br>iBright™ Prestained<br>Protein Ladder<br>LC5615 | 15mpi<br>Replication #2 | 15mpi<br>Replication #3 | 30mpi<br>Replication #2 | 30mpi<br>Replication #3 | 45mpi<br>Replication #2 | 45mpi<br>Replication #3 | 60mpi<br>Replication #2 | 60mpi<br>Replication #2 |

Fig2.

Anti PKC $\delta$  antibody  
(total PKC $\delta$ )

(FIPV - / RL - )

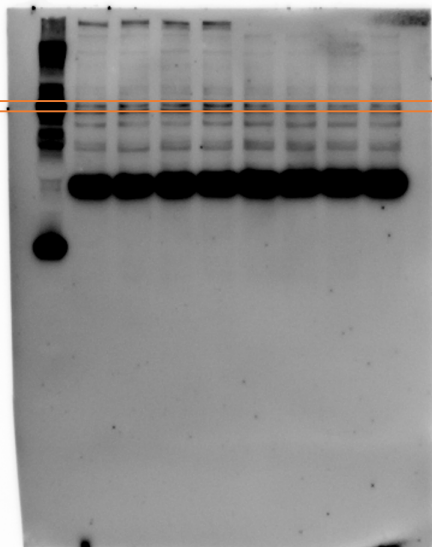

Anti PKC $\delta$  antibody  
(total PKC $\delta$ )

(FIPV + / RL - )

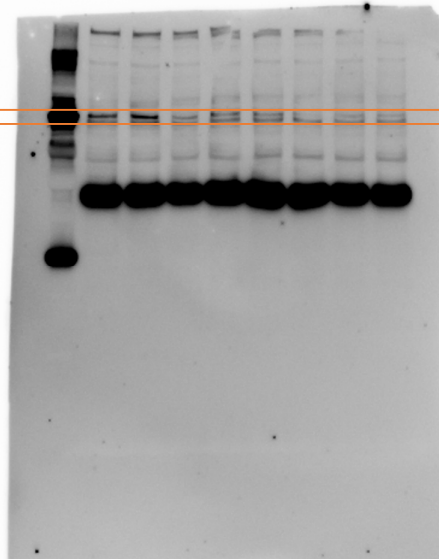

Anti PKC $\delta$  antibody  
(total PKC $\delta$ )

(FIPV + / RL + )

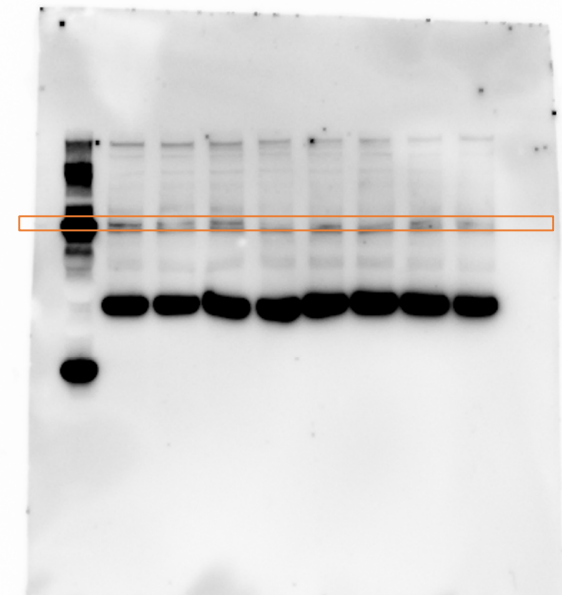

| marker                                                         | 1                       | 2                       | 3                       | 4                       | 5                       | 6                       | 7                       | 8                       |
|----------------------------------------------------------------|-------------------------|-------------------------|-------------------------|-------------------------|-------------------------|-------------------------|-------------------------|-------------------------|
| Invitrogen™<br>iBright™ Prestained<br>Protein Ladder<br>LC5615 | 15mpi<br>Replication #2 | 15mpi<br>Replication #3 | 30mpi<br>Replication #2 | 30mpi<br>Replication #3 | 45mpi<br>Replication #2 | 45mpi<br>Replication #3 | 60mpi<br>Replication #2 | 60mpi<br>Replication #2 |

Fig2.

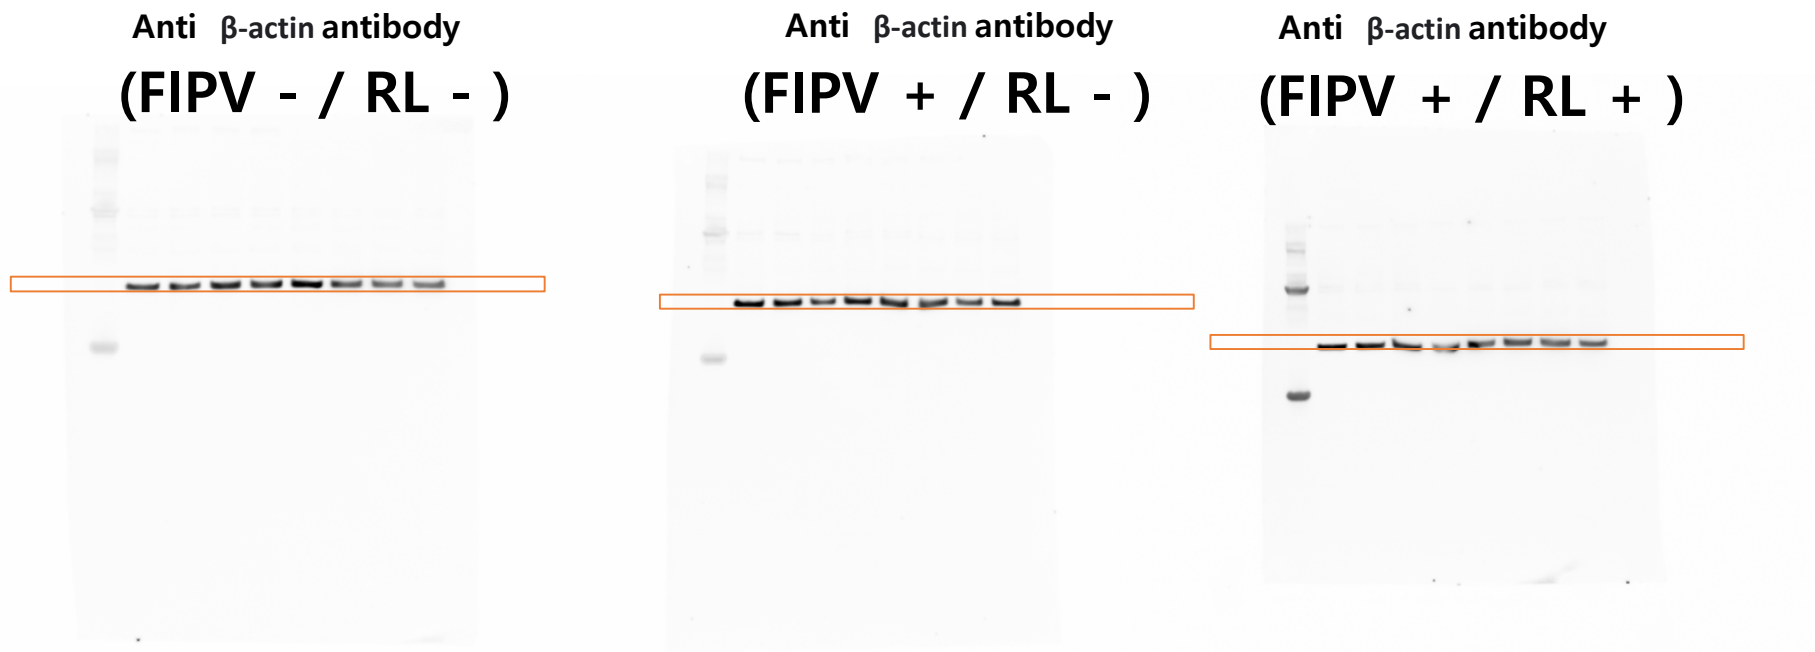

| marker                                                         | 1                       | 2                       | 3                       | 4                       | 5                       | 6                       | 7                       | 8                       |
|----------------------------------------------------------------|-------------------------|-------------------------|-------------------------|-------------------------|-------------------------|-------------------------|-------------------------|-------------------------|
| Invitrogen™<br>iBright™ Prestained<br>Protein Ladder<br>LC5615 | 15mpi<br>Replication #2 | 15mpi<br>Replication #3 | 30mpi<br>Replication #2 | 30mpi<br>Replication #3 | 45mpi<br>Replication #2 | 45mpi<br>Replication #3 | 60mpi<br>Replication #2 | 60mpi<br>Replication #2 |

Fig2.

| 1                        | 2                        | 3                      | 4                        | 5                        | 6                      | 7                        | 8                        | 9                      | 10                       | 11                       | 12                     | marker                                                            |
|--------------------------|--------------------------|------------------------|--------------------------|--------------------------|------------------------|--------------------------|--------------------------|------------------------|--------------------------|--------------------------|------------------------|-------------------------------------------------------------------|
| 15mpi<br>(FIPV - / RL -) | 15mpi<br>(FIPV + / RL -) | 15mpi<br>(FIPV +/RL +) | 30mpi<br>(FIPV - / RL -) | 30mpi<br>(FIPV + / RL -) | 30mpi<br>(FIPV +/RL +) | 45mpi<br>(FIPV - / RL -) | 45mpi<br>(FIPV + / RL -) | 45mpi<br>(FIPV +/RL +) | 60mpi<br>(FIPV - / RL -) | 60mpi<br>(FIPV + / RL -) | 60mpi<br>(FIPV +/RL +) | Invitrogen™<br>iBright™<br>Prestained<br>Protein Ladder<br>LC5615 |

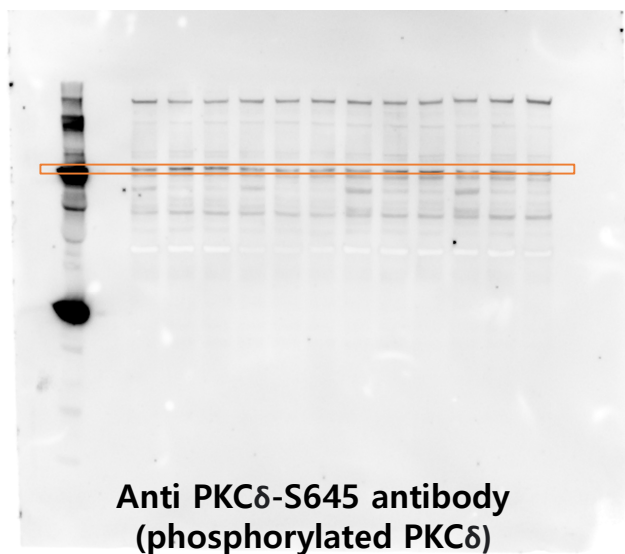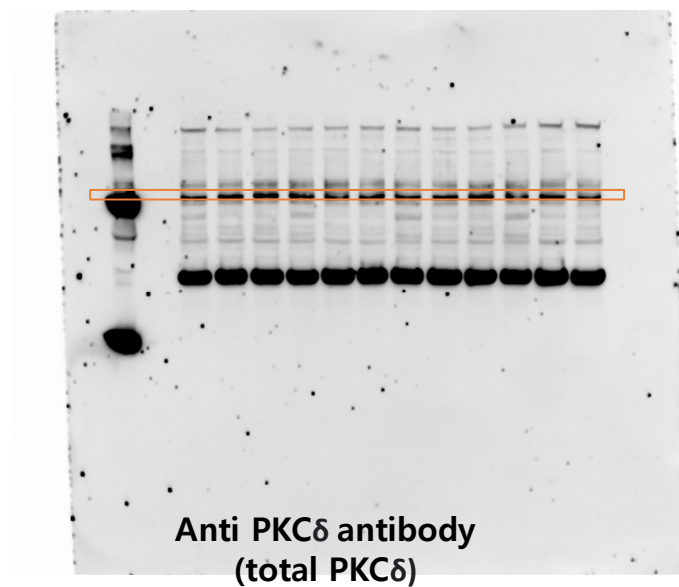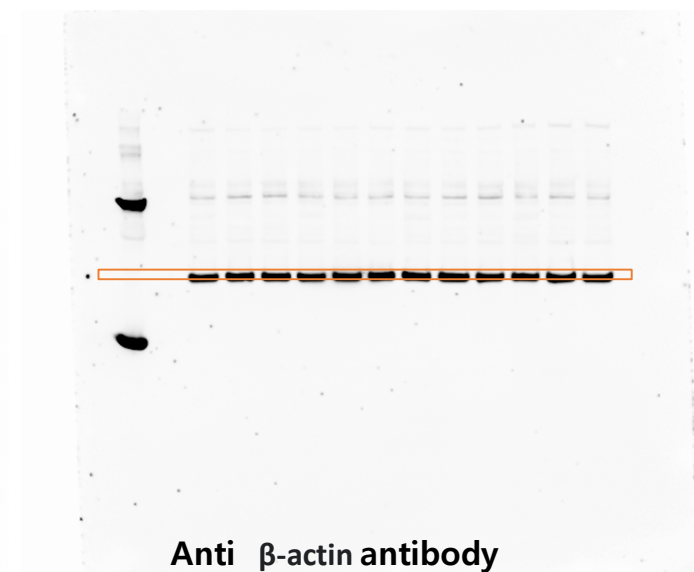

Supplement: s1 [file s1]
